# Supplementary material for: Multiple d–d bonds between early transition metals in TM2Lin (TM = Sc, Ti) superatomic molecule clusters
Source: Royal Society of Chemistry journal article supplement (doi:10.1039/d0nr05480a), 2020-01-01
Supplement: d0nr05480a1.pdf [file d0nr05480a1.pdf]

## Supplementary Information

### Multiple d-d bonds between early transition metals in $\text{TM}_2\text{Li}_n$ (TM = Sc, Ti) superatomic molecule clusters

By

Yichun Zhou, Xinlei Yu, Longjiu Cheng\*

<sup>1</sup>Department of Chemistry, Key Laboratory of Functional Inorganic Materials of Anhui Province, Anhui University, Hefei, Anhui, 230601, China.

\*Corresponding author. E-mail: clj@ustc.edu

#### Contents:

1. **Figure S1.** ELF's for  $\text{Li}_{18}\text{Ti}_2$  (a),  $\text{Li}_{20}\text{Sc}_2$  (b),  $\text{Li}_{24}\text{Sc}_2$  (c),  $\text{Li}_{24}\text{Y}_2$  (d),  $[\text{Li}_{17}\text{Ti}_2]^-$  (e), and  $[\text{Li}_{17}\text{V}_2]^+$  (f) in color and shape. The scale is labeled aside. All cross sections are perpendicular to the double transition metal. ELF values is between 0 (no localization, blue) and 1 (complete localization, red).
2. **Figure S2.** ELF's of multiple bond  $\text{Li}_{18}\text{Ti}_2$  (a),  $\text{Li}_{20}\text{Sc}_2$  (b),  $\text{Li}_{24}\text{Sc}_2$  (c) and  $\text{Li}_{24}\text{Y}_2$  (d) in color and shape. The scale is labeled aside. All cross sections are perpendicular to the double transition metal. ELF values is between 0 (no localization, blue) and 1 (complete localization, red)
3. **Figure S3.** Localization on  $\text{TM}_2$  atoms of the delocalized multiple super-bonding orbitals in  $\text{Li}_{24}\text{Sc}_2$  (**C1**),  $\text{Li}_{20}\text{Sc}_2$  (**B4**),  $\text{Li}_{18}\text{Ti}_2$  (**A4**),  $[\text{Li}_{17}\text{Ti}_2]^-$ , and  $[\text{Li}_{17}\text{V}_2]^+$  clusters. ON represents the occupancy number on  $\text{TM}_2$  atoms of the delocalized bond.
4. **Figure S4.** Kohn–Sham MO diagrams of  $\text{Ti}_2$ ,  $\text{Sc}_2$ , and  $\text{V}_2$  molecules (PBE0/def2-TZVP).
5. Cartesian coordinates (in angstrom) of the structures reported in this work.

---

\*Corresponding authors: E-mail: clj@ustc.edu.

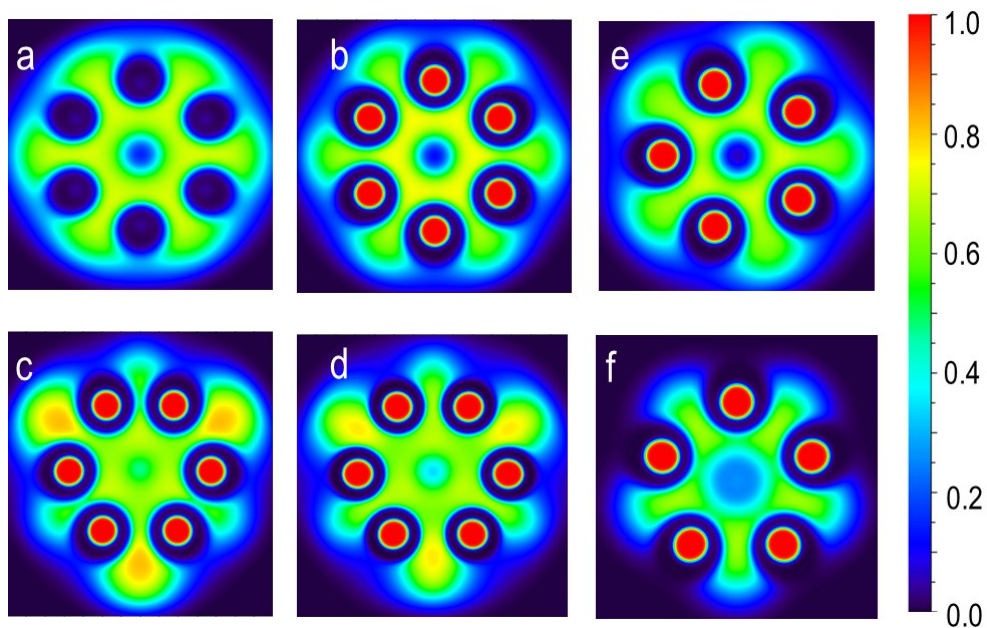

**Figure S1.** ELFs for  $\text{Li}_{18}\text{Ti}_2$  (a),  $\text{Li}_{20}\text{Sc}_2$  (b),  $\text{Li}_{24}\text{Sc}_2$  (c),  $\text{Li}_{24}\text{Y}_2$  (d),  $[\text{Li}_{17}\text{Ti}_2]^-$  (e), and  $[\text{Li}_{17}\text{V}_2]^+$  (f) in color and shape. The scale is labeled aside. All cross sections are perpendicular to the double transition metal. ELF values are between 0 (no localization, blue) and 1 (complete localization, red).

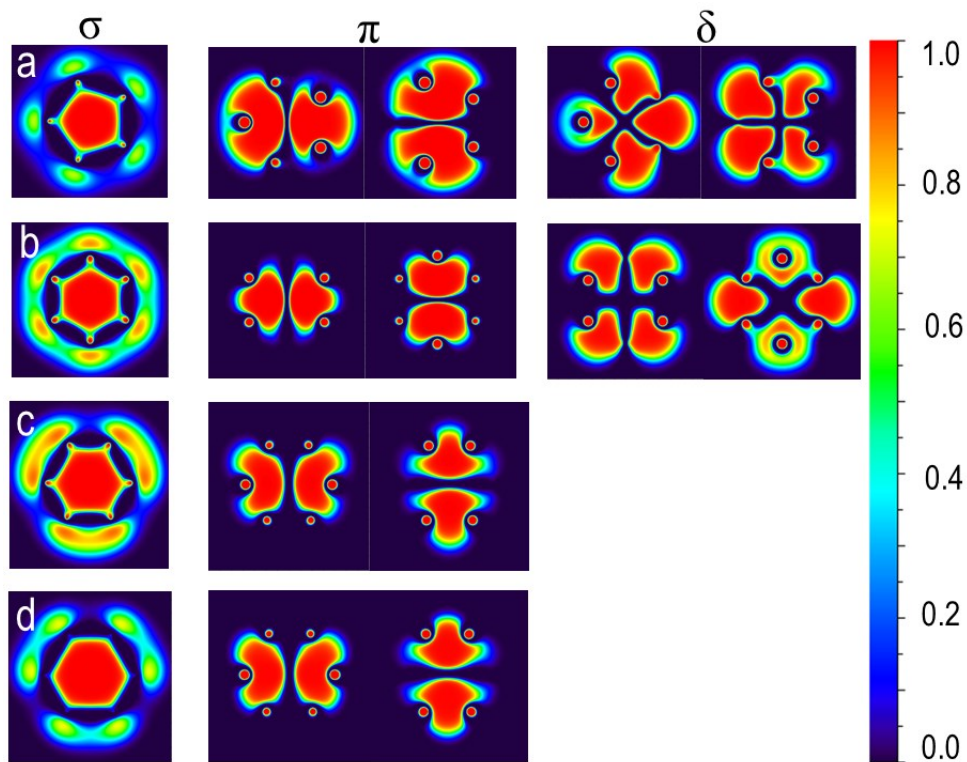

**Figure S2.** ELFs of multiple bonding  $\text{Li}_{18}\text{Ti}_2$  (a),  $\text{Li}_{20}\text{Sc}_2$  (b),  $\text{Li}_{24}\text{Sc}_2$  (c) and  $\text{Li}_{24}\text{Y}_2$  (d) in color and shape. The scale is labeled aside. All cross sections are perpendicular to the double transition metal. ELF values are between 0 (no localization, blue) and 1 (complete localization, red)

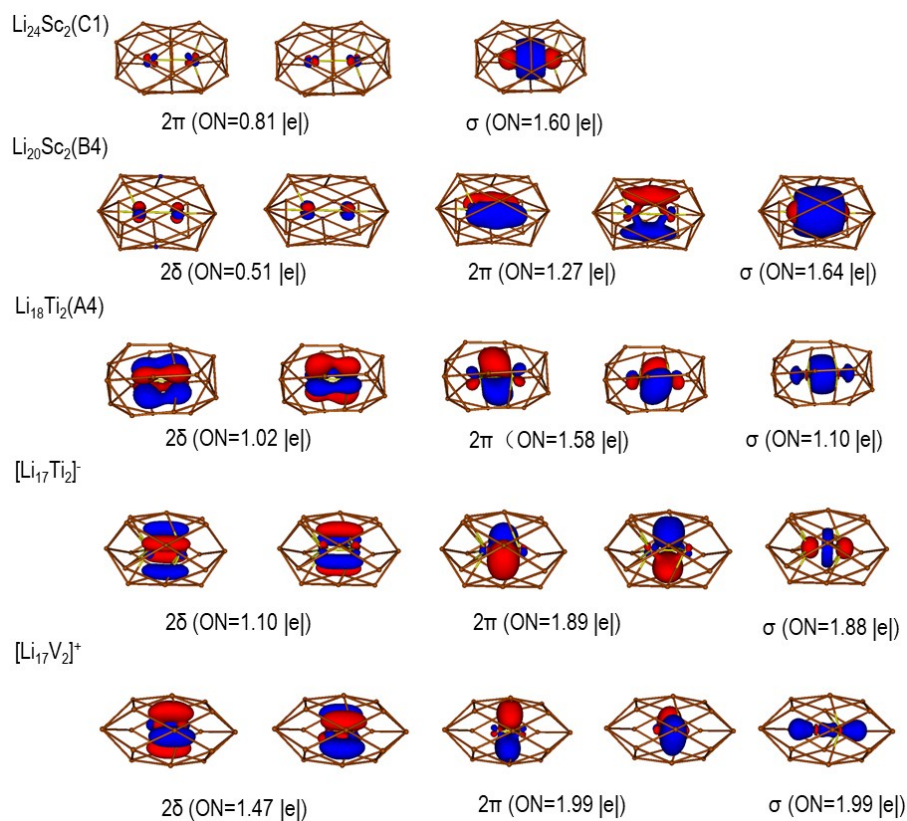

**Figure S3.** Localization on  $\text{TM}_2$  atoms of the delocalized multiple super-bonding orbitals in  $\text{Li}_{24}\text{Sc}_2$  (**C1**),  $\text{Li}_{20}\text{Sc}_2$  (**B4**),  $\text{Li}_{18}\text{Ti}_2$  (**A4**),  $[\text{Li}_{17}\text{Ti}_2]^-$ , and  $[\text{Li}_{17}\text{V}_2]^+$  clusters. ON represents the occupancy number on  $\text{TM}_2$  atoms of the delocalized bond.

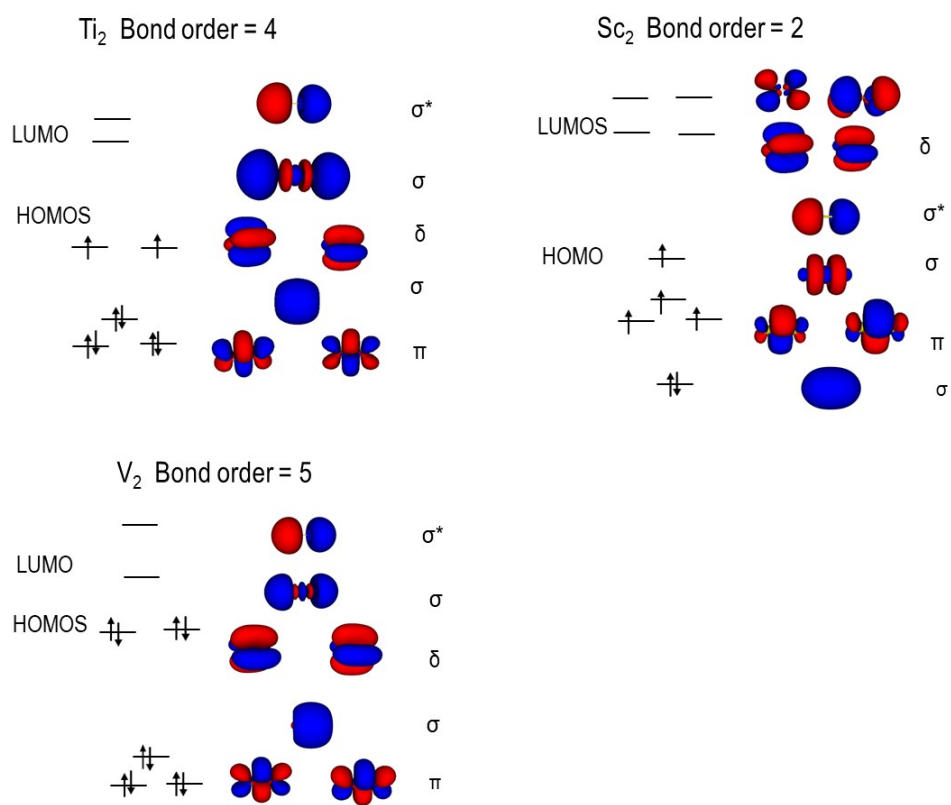

**Figure S4.** Kohn-Sham MO diagrams of  $Ti_2$ ,  $Sc_2$ , and  $V_2$  molecules (PBE0/def2-TZVP)

---

Cartesian coordinates (in angstrom) of the structures:

Li<sub>18</sub>Ti<sub>2</sub> (A1)

|    |           |           |           |
|----|-----------|-----------|-----------|
| Li | 0.130154  | -2.425519 | -1.366187 |
| Li | -0.273384 | -3.521492 | 1.269065  |
| Li | 2.298858  | -1.428030 | -0.438582 |
| Li | 2.030344  | -2.007003 | 2.415853  |
| Li | -2.152852 | -1.306030 | -1.093139 |
| Li | 0.535651  | -0.714814 | -3.648930 |
| Li | -0.605680 | -1.973952 | 3.753892  |
| Li | -2.737474 | -1.895317 | 1.708557  |
| Li | 2.811900  | 0.717966  | -2.359418 |
| Li | 2.342787  | 0.921333  | 0.909673  |
| Li | -1.953635 | 0.829845  | -3.078504 |
| Li | 0.598102  | 2.226557  | -3.609286 |
| Li | 0.980920  | 0.526050  | 3.546183  |
| Li | -2.456719 | 1.049340  | 0.196084  |
| Li | 1.727301  | 3.128985  | -1.017525 |
| Li | -1.947283 | 0.594264  | 3.109680  |
| Li | -0.133282 | 2.304087  | 1.291393  |
| Li | -1.201534 | 3.199792  | -1.461368 |
| Ti | -0.166938 | -0.598021 | 1.013181  |
| Ti | 0.167732  | 0.567194  | -1.030559 |

Li<sub>18</sub>Ti<sub>2</sub> (A2)

|    |           |           |           |
|----|-----------|-----------|-----------|
| Li | -2.356458 | 1.954840  | 2.151762  |
| Li | -3.529673 | -0.688618 | 2.320626  |
| Li | -3.063960 | -2.112062 | -0.293158 |
| Li | 1.367103  | 0.950583  | 2.177516  |
| Li | -1.296795 | 2.049923  | -1.317943 |
| Li | -3.672355 | 0.758895  | -0.232278 |
| Li | -1.403441 | -2.763382 | 2.086712  |
| Li | 0.049133  | 2.643828  | 0.783355  |
| Li | -0.860561 | -0.211035 | 3.580115  |
| Li | -1.361284 | -0.465207 | -2.257867 |
| Li | 2.492083  | 2.728064  | -0.715258 |
| Li | 0.995331  | 1.770060  | -3.112806 |
| Li | 1.340710  | -1.694116 | 1.577556  |
| Li | 3.695915  | 0.349618  | 0.546796  |
| Li | -0.075473 | -2.552212 | -0.766060 |
| Li | 1.319611  | -1.209619 | -3.265545 |
| Li | 3.550678  | 0.514851  | -2.377669 |
| Li | 2.942132  | -2.051100 | -0.945319 |
| Ti | -0.990718 | -0.190730 | 0.649849  |

---

|    |          |          |           |
|----|----------|----------|-----------|
| Ti | 0.972623 | 0.194369 | -0.641740 |
|----|----------|----------|-----------|

Li<sub>18</sub>Ti<sub>2</sub> (A3)

|    |           |           |           |
|----|-----------|-----------|-----------|
| Li | -0.612110 | -0.993980 | 2.420578  |
| Li | -2.616282 | 1.136608  | 2.048404  |
| Li | -3.157966 | -1.591165 | 0.686180  |
| Li | 2.074340  | 0.260032  | 3.077179  |
| Li | 1.830190  | -2.536170 | 1.875721  |
| Li | -5.663570 | -1.023779 | -1.348837 |
| Li | 0.190213  | 2.099839  | 1.826045  |
| Li | -0.359772 | -2.620772 | -0.181472 |
| Li | -3.451066 | 0.795808  | -0.772082 |
| Li | -2.508476 | -1.487802 | -2.115911 |
| Li | 2.510037  | -2.425965 | -1.055997 |
| Li | -1.600359 | 3.079235  | -0.256016 |
| Li | 2.982031  | 2.212765  | 0.775182  |
| Li | 0.529536  | -0.810202 | -2.506722 |
| Li | 3.210114  | 0.444185  | -1.826392 |
| Li | -1.465773 | 1.322182  | -2.903766 |
| Li | 0.939158  | 2.221847  | -1.400825 |
| Li | 3.900676  | -0.599286 | 0.881080  |
| Ti | 1.191619  | -0.100335 | 0.272533  |
| Ti | -0.745836 | 0.170783  | -0.166490 |

Li<sub>18</sub>Ti<sub>2</sub> (A4)

|    |           |           |           |
|----|-----------|-----------|-----------|
| Li | 1.461365  | 0.843719  | 3.737520  |
| Li | 2.310686  | 1.334075  | 0.674856  |
| Li | 0.000000  | 2.807865  | 2.175389  |
| Li | -1.461365 | 0.843719  | 3.737520  |
| Li | -0.000000 | -1.687439 | 3.737520  |
| Li | 2.431683  | -1.403933 | 2.175389  |
| Li | 0.000000  | 1.687439  | -3.737520 |
| Li | 2.431683  | 1.403933  | -2.175389 |
| Li | -0.000000 | -2.668150 | 0.674856  |
| Li | -1.461365 | -0.843719 | -3.737520 |
| Li | 2.310686  | -1.334075 | -0.674856 |
| Li | 0.000000  | 2.668150  | -0.674856 |
| Li | -2.431683 | -1.403933 | 2.175389  |
| Li | -2.431683 | 1.403933  | -2.175389 |
| Li | -2.310686 | 1.334075  | 0.674856  |
| Li | -0.000000 | -2.807865 | -2.175389 |
| Li | 1.461365  | -0.843719 | -3.737520 |
| Li | -2.310686 | -1.334075 | -0.674856 |
| Ti | 0.000000  | 0.000000  | 1.226356  |

---

|    |          |           |           |
|----|----------|-----------|-----------|
| Ti | 0.000000 | -0.000000 | -1.226356 |
|----|----------|-----------|-----------|

Li<sub>20</sub>Sc<sub>2</sub> (B1):

|    |           |           |           |
|----|-----------|-----------|-----------|
| Li | -2.329924 | 2.709391  | -1.460263 |
| Li | 0.014610  | 1.312835  | -2.539271 |
| Li | -4.306961 | 1.377956  | 0.243535  |
| Li | -2.051621 | 2.732861  | 1.533514  |
| Li | 0.390324  | 2.762086  | -0.179863 |
| Li | -3.238514 | 0.001907  | -2.443037 |
| Li | 0.000710  | -1.318213 | -2.539156 |
| Li | 3.108496  | 1.579484  | -2.146861 |
| Li | -4.312737 | -1.364071 | 0.247571  |
| Li | -2.345182 | -2.708800 | -1.455756 |
| Li | -2.724924 | 0.003518  | 2.742395  |
| Li | -2.060675 | -2.728188 | 1.534677  |
| Li | 0.382037  | -2.762936 | -0.182664 |
| Li | 3.100482  | -1.558277 | -2.165030 |
| Li | 0.367453  | 1.383838  | 2.411792  |
| Li | 3.266344  | 2.412648  | 0.865201  |
| Li | 4.707962  | -0.002103 | -0.114460 |
| Li | 0.365691  | -1.391695 | 2.408264  |
| Li | 3.265533  | -2.423616 | 0.840787  |
| Li | 3.279831  | -0.013136 | 2.611146  |
| Sc | -1.412904 | 0.000511  | 0.014090  |
| Sc | 1.573056  | -0.001295 | -0.044450 |

Li<sub>20</sub>Sc<sub>2</sub> (B2)

|    |           |           |           |
|----|-----------|-----------|-----------|
| Li | 2.985797  | -0.083990 | -2.600956 |
| Li | 2.043968  | -2.760185 | -1.520037 |
| Li | 4.405652  | 1.184158  | 0.006644  |
| Li | -3.178928 | 0.789607  | -2.522580 |
| Li | -0.481419 | -2.727945 | 0.001316  |
| Li | -0.265484 | -1.240537 | -2.510646 |
| Li | 2.040669  | -2.755895 | 1.530665  |
| Li | 2.384660  | 2.667494  | -1.499302 |
| Li | 4.227393  | -1.548123 | 0.007169  |
| Li | -3.192526 | -2.087106 | -1.565034 |
| Li | 2.971183  | -0.073457 | 2.608965  |
| Li | -3.193800 | -2.092545 | 1.553860  |
| Li | -4.715886 | -0.035274 | -0.002649 |
| Li | -0.269924 | -1.232490 | 2.512469  |
| Li | -0.110353 | 1.449610  | -2.439001 |
| Li | 2.375013  | 2.676320  | 1.493575  |
| Li | -3.327785 | 2.564261  | 0.009784  |



---

|    |           |           |           |
|----|-----------|-----------|-----------|
| Li | -0.122725 | 1.461630  | 2.427963  |
| Li | -3.185118 | 0.774503  | 2.525718  |
| Li | -0.239576 | 2.803937  | -0.010771 |
| Sc | -1.578076 | 0.047648  | -0.001272 |
| Sc | 1.413674  | -0.009644 | 0.000250  |

**Li<sub>20</sub>Sc<sub>2</sub> (B3)**

|    |           |           |           |
|----|-----------|-----------|-----------|
| Li | 1.950915  | 0.824083  | -4.054902 |
| Li | 2.491328  | -1.804165 | -2.960816 |
| Li | 0.028977  | -3.003530 | -1.692799 |
| Li | 3.257946  | 0.653003  | -1.035034 |
| Li | -0.322123 | -1.159878 | -4.194344 |
| Li | 2.613588  | -0.063981 | 2.119401  |
| Li | -2.614756 | 0.069993  | -2.117917 |
| Li | -0.861603 | 1.782988  | -3.844356 |
| Li | 2.032093  | -1.866878 | 0.095751  |
| Li | 1.250298  | 2.952223  | -2.066251 |
| Li | 1.377686  | 2.216394  | 0.753626  |
| Li | -1.367067 | 2.262291  | -0.625469 |
| Li | -0.039106 | -3.092460 | 1.517983  |
| Li | -3.254170 | 0.606319  | 1.070078  |
| Li | -2.037657 | -1.849874 | -0.204402 |
| Li | 0.867545  | 1.555849  | 3.940711  |
| Li | 0.313089  | -1.398645 | 4.123484  |
| Li | -1.237722 | 2.834481  | 2.232170  |
| Li | -2.499743 | -1.960497 | 2.850624  |
| Li | -1.950348 | 0.599214  | 4.095445  |
| Sc | 0.363295  | 0.029277  | -1.452301 |
| Sc | -0.363176 | -0.051696 | 1.451875  |

**Li<sub>20</sub>Sc<sub>2</sub> (B4)**

|    |           |           |           |
|----|-----------|-----------|-----------|
| Li | 1.417323  | 2.454875  | -2.861819 |
| Li | 0.000000  | 0.000000  | -4.452916 |
| Li | -1.417323 | 2.454875  | -2.861819 |
| Li | 2.834645  | -0.000000 | -2.861819 |
| Li | -2.834645 | 0.000000  | -2.861819 |
| Li | 1.417323  | -2.454875 | -2.861819 |
| Li | -0.000000 | 2.800232  | -0.000000 |
| Li | -1.417323 | -2.454875 | -2.861819 |
| Li | 2.425072  | 1.400116  | -0.000000 |
| Li | -2.425072 | 1.400116  | -0.000000 |
| Li | -2.425072 | -1.400116 | -0.000000 |
| Li | -1.417323 | 2.454875  | 2.861819  |
| Li | -0.000000 | -2.800232 | -0.000000 |

---

|    |           |           |           |
|----|-----------|-----------|-----------|
| Li | 1.417323  | 2.454875  | 2.861819  |
| Li | -2.834645 | 0.000000  | 2.861819  |
| Li | 2.834645  | -0.000000 | 2.861819  |
| Li | 2.425072  | -1.400116 | -0.000000 |
| Li | 1.417323  | -2.454875 | 2.861819  |
| Li | -1.417323 | -2.454875 | 2.861819  |
| Li | -0.000000 | 0.000000  | 4.452916  |
| Sc | 0.000000  | 0.000000  | -1.467610 |
| Sc | -0.000000 | 0.000000  | 1.467610  |

Li<sub>24</sub>Sc<sub>2</sub> (C1)

|    |           |           |           |
|----|-----------|-----------|-----------|
| Li | -0.000000 | 2.930441  | 2.804222  |
| Li | 1.466195  | 0.846508  | 4.518871  |
| Li | -1.466195 | 0.846508  | 4.518871  |
| Li | -2.836695 | 1.637767  | 2.265656  |
| Li | 2.836695  | 1.637767  | 2.265656  |
| Li | 1.305625  | 2.414240  | -0.000000 |
| Li | -0.000000 | -1.693016 | 4.518871  |
| Li | -0.000000 | -3.275534 | 2.265656  |
| Li | -1.305625 | 2.414240  | 0.000000  |
| Li | 2.537836  | -1.465220 | 2.804222  |
| Li | -2.537836 | -1.465220 | 2.804222  |
| Li | 2.743605  | -0.076415 | 0.000000  |
| Li | -2.743605 | -0.076415 | -0.000000 |
| Li | -2.836695 | 1.637767  | -2.265656 |
| Li | 0.000000  | 2.930441  | -2.804222 |
| Li | -1.437980 | -2.337824 | 0.000000  |
| Li | 2.836695  | 1.637767  | -2.265656 |
| Li | 1.437980  | -2.337824 | -0.000000 |
| Li | -2.537836 | -1.465220 | -2.804222 |
| Li | 1.466195  | 0.846508  | -4.518871 |
| Li | 2.537836  | -1.465220 | -2.804222 |
| Li | -1.466195 | 0.846508  | -4.518871 |
| Li | -0.000000 | -1.693016 | -4.518871 |
| Li | -0.000000 | -3.275534 | -2.265656 |
| Sc | -0.000000 | -0.000000 | 1.751545  |
| Sc | 0.000000  | -0.000000 | -1.751545 |

Li<sub>24</sub>Sc<sub>2</sub> (C2)

|    |           |           |           |
|----|-----------|-----------|-----------|
| Li | 0.000000  | -3.289252 | 2.338141  |
| Li | 0.000000  | -1.674885 | 4.530365  |
| Li | 2.848576  | -1.644626 | -2.338141 |
| Li | -1.450493 | 0.837443  | 4.530365  |
| Li | 1.450493  | 0.837443  | 4.530365  |

---

|    |           |           |           |
|----|-----------|-----------|-----------|
| Li | 1.365254  | -2.364689 | -0.000000 |
| Li | 2.546834  | -1.470416 | 2.768070  |
| Li | -2.546834 | -1.470416 | 2.768070  |
| Li | -1.365254 | -2.364689 | -0.000000 |
| Li | -0.000000 | 2.940831  | 2.768070  |
| Li | 2.730507  | -0.000000 | -0.000000 |
| Li | -2.848576 | 1.644626  | 2.338141  |
| Li | -1.365254 | 2.364689  | 0.000000  |
| Li | 2.848576  | 1.644626  | 2.338141  |
| Li | -2.848576 | -1.644626 | -2.338141 |
| Li | 0.000000  | -2.940831 | -2.768070 |
| Li | -2.730507 | 0.000000  | 0.000000  |
| Li | 1.450493  | -0.837443 | -4.530365 |
| Li | 1.365254  | 2.364689  | 0.000000  |
| Li | -1.450493 | -0.837443 | -4.530365 |
| Li | 2.546834  | 1.470416  | -2.768070 |
| Li | -0.000000 | 1.674885  | -4.530365 |
| Li | -0.000000 | 3.289252  | -2.338141 |
| Li | -2.546834 | 1.470416  | -2.768070 |
| Sc | -0.000000 | 0.000000  | 1.760298  |
| Sc | -0.000000 | -0.000000 | -1.760298 |

Li<sub>24</sub>Sc<sub>2</sub> (C3)

|    |           |           |           |
|----|-----------|-----------|-----------|
| Li | -4.796758 | -0.275245 | -0.525738 |
| Li | -3.659883 | -2.814807 | -1.239856 |
| Li | -3.424140 | -1.835631 | 1.558359  |
| Li | -0.938752 | -0.486254 | 2.164072  |
| Li | -3.179659 | 1.222809  | 1.547879  |
| Li | 1.135877  | -2.386735 | 2.119008  |
| Li | -3.677379 | 2.188885  | -1.253936 |
| Li | -3.256458 | -0.452587 | -3.362992 |
| Li | -1.133236 | -3.183340 | 0.259802  |
| Li | -1.328345 | -2.862010 | -2.813148 |
| Li | 1.584799  | 3.628020  | 0.684585  |
| Li | 1.330695  | 0.055133  | 4.012174  |
| Li | 0.048308  | 2.238703  | 2.719722  |
| Li | -1.587751 | 2.012512  | -3.093618 |
| Li | -0.996266 | 2.444598  | 0.012359  |
| Li | 0.939833  | -1.898742 | -1.144929 |
| Li | -0.049045 | -0.416676 | -3.497009 |
| Li | 3.426971  | -2.391692 | 0.247157  |
| Li | 3.662259  | -1.047236 | 2.888813  |
| Li | 3.256484  | 2.120216  | 2.650537  |
| Li | 3.675080  | 2.423325  | -0.717259 |

---

|    |           |           |           |
|----|-----------|-----------|-----------|
| Li | 0.994427  | 1.683045  | -1.775723 |
| Li | 3.178796  | -0.269810 | -1.954560 |
| Li | 4.795723  | 0.194742  | 0.560271  |
| Sc | -1.630852 | -0.326798 | -0.783261 |
| Sc | 1.630626  | 0.342338  | 0.776694  |

Li<sub>24</sub>Y<sub>2</sub> (**D1**):

|    |           |           |           |
|----|-----------|-----------|-----------|
| Li | -1.492120 | 0.861476  | 4.636969  |
| Li | -0.000000 | -1.722952 | 4.636969  |
| Li | 2.874322  | 1.659491  | 2.333496  |
| Li | -2.610295 | -1.507054 | 2.890373  |
| Li | 1.492120  | 0.861476  | 4.636969  |
| Li | 2.610295  | -1.507054 | 2.890373  |
| Li | -2.874322 | 1.659491  | 2.333496  |
| Li | 1.348122  | 2.501203  | -0.000000 |
| Li | -0.000000 | -3.318981 | 2.333496  |
| Li | 2.840166  | -0.083093 | 0.000000  |
| Li | 2.610295  | -1.507054 | -2.890373 |
| Li | -0.000000 | -3.318981 | -2.333496 |
| Li | 1.492120  | 0.861476  | -4.636969 |
| Li | -1.348122 | 2.501203  | 0.000000  |
| Li | 0.000000  | 3.014109  | 2.890373  |
| Li | 1.492044  | -2.418109 | -0.000000 |
| Li | -1.492044 | -2.418109 | 0.000000  |
| Li | 2.874322  | 1.659491  | -2.333496 |
| Li | -2.840166 | -0.083093 | -0.000000 |
| Li | 0.000000  | -1.722952 | -4.636969 |
| Li | 0.000000  | 3.014109  | -2.890373 |
| Li | -2.610295 | -1.507054 | -2.890373 |
| Li | -2.874322 | 1.659491  | -2.333496 |
| Li | -1.492120 | 0.861476  | -4.636969 |
| Y  | -0.000000 | 0.000000  | 1.814235  |
| Y  | 0.000000  | 0.000000  | -1.814235 |

Li<sub>24</sub>Y<sub>2</sub> (**D2**):

|    |           |           |           |
|----|-----------|-----------|-----------|
| Li | 0.000000  | 3.332027  | -2.405502 |
| Li | 0.000000  | 1.706030  | -4.651320 |
| Li | -2.619578 | 1.512414  | -2.859517 |
| Li | 2.619578  | 1.512414  | -2.859517 |
| Li | 1.412053  | 2.445748  | 0.000000  |
| Li | -1.412053 | 2.445748  | 0.000000  |
| Li | 1.477465  | -0.853015 | -4.651320 |
| Li | -1.477465 | -0.853015 | -4.651320 |
| Li | -2.824107 | -0.000000 | -0.000000 |

---

|    |           |           |           |
|----|-----------|-----------|-----------|
| Li | 2.824107  | -0.000000 | 0.000000  |
| Li | 2.885620  | -1.666013 | -2.405502 |
| Li | 2.885620  | 1.666013  | 2.405502  |
| Li | -2.885620 | 1.666013  | 2.405502  |
| Li | -1.412053 | -2.445748 | -0.000000 |
| Li | 2.619578  | -1.512414 | 2.859517  |
| Li | -0.000000 | -3.024828 | -2.859517 |
| Li | -2.619578 | -1.512414 | 2.859517  |
| Li | -2.885620 | -1.666013 | -2.405502 |
| Li | 1.412053  | -2.445748 | 0.000000  |
| Li | -0.000000 | 3.024828  | 2.859517  |
| Li | -0.000000 | -3.332027 | 2.405502  |
| Li | -0.000000 | -1.706030 | 4.651320  |
| Li | 1.477465  | 0.853015  | 4.651320  |
| Li | -1.477465 | 0.853015  | 4.651320  |
| Y  | -0.000000 | -0.000000 | -1.824261 |
| Y  | -0.000000 | 0.000000  | 1.824261  |

Li<sub>24</sub>Y<sub>2</sub> (**D3**):

|    |           |           |           |
|----|-----------|-----------|-----------|
| Li | -0.997857 | 3.318898  | -2.183723 |
| Li | -1.334216 | 0.576884  | -3.897713 |
| Li | -1.944320 | -2.348096 | -2.726438 |
| Li | 3.521899  | -0.362694 | -2.057845 |
| Li | -3.570173 | 2.331219  | -2.463466 |
| Li | -2.769459 | 3.031019  | 0.523376  |
| Li | -4.083837 | -0.579884 | -2.774105 |
| Li | 1.200776  | 1.421213  | -2.092922 |
| Li | 0.790852  | -1.354646 | -2.391890 |
| Li | -1.232704 | -1.517954 | 2.001515  |
| Li | -0.776288 | 1.253852  | 2.387456  |
| Li | -3.612322 | -2.095364 | -0.050751 |
| Li | -0.356514 | -2.823302 | -0.289700 |
| Li | -4.907977 | 0.840453  | -0.292886 |
| Li | -3.534159 | 0.316009  | 2.054110  |
| Li | 1.078175  | -3.274457 | 2.269560  |
| Li | 3.560433  | 2.119159  | -0.002208 |
| Li | 0.430773  | 2.749951  | 0.302663  |
| Li | 4.913263  | -0.709028 | 0.311472  |
| Li | 1.888172  | 2.409723  | 2.775837  |
| Li | 2.844433  | -3.055412 | -0.452332 |
| Li | 3.663852  | -2.262820 | 2.505411  |
| Li | 1.340717  | -0.595902 | 3.907661  |
| Li | 4.025709  | 0.658760  | 2.769349  |
| Y  | -1.655114 | 0.321909  | -0.734182 |

---

|   |          |           |          |
|---|----------|-----------|----------|
| Y | 1.644404 | -0.325569 | 0.723995 |
|---|----------|-----------|----------|

[Li<sub>17</sub>Ti<sub>2</sub>]<sup>-</sup>:

|    |           |           |           |
|----|-----------|-----------|-----------|
| Li | 0.000000  | 0.000000  | 4.179599  |
| Li | 0.000000  | -2.550556 | 2.628878  |
| Li | 2.425723  | -0.788165 | 2.628878  |
| Li | 1.499179  | 2.063443  | 2.628878  |
| Li | -1.499179 | 2.063443  | 2.628878  |
| Li | -2.425723 | -0.788165 | 2.628878  |
| Li | -0.000000 | 2.619724  | -0.000000 |
| Li | 1.539835  | -2.119402 | -0.000000 |
| Li | -1.539835 | -2.119402 | -0.000000 |
| Li | 2.491506  | 0.809539  | -0.000000 |
| Li | -2.491506 | 0.809539  | -0.000000 |
| Li | 0.000000  | -2.550556 | -2.628878 |
| Li | 2.425723  | -0.788165 | -2.628878 |
| Li | -2.425723 | -0.788165 | -2.628878 |
| Li | 1.499179  | 2.063443  | -2.628878 |
| Li | -1.499179 | 2.063443  | -2.628878 |
| Li | 0.000000  | 0.000000  | -4.179599 |
| Ti | 0.000000  | 0.000000  | 1.141322  |
| Ti | 0.000000  | 0.000000  | -1.141322 |

[Li<sub>17</sub>V<sub>2</sub>]<sup>+</sup>:

|    |           |           |           |
|----|-----------|-----------|-----------|
| Li | 0.000000  | 0.000000  | 4.922462  |
| Li | -0.000000 | -2.356836 | 2.733633  |
| Li | 2.241484  | -0.728302 | 2.733633  |
| Li | 1.385313  | 1.906720  | 2.733633  |
| Li | -1.385313 | 1.906720  | 2.733633  |
| Li | -2.241484 | -0.728302 | 2.733633  |
| Li | 0.000000  | 2.627714  | -0.000000 |
| Li | 1.544531  | -2.125865 | -0.000000 |
| Li | -1.544531 | -2.125865 | -0.000000 |
| Li | 2.499104  | 0.812008  | -0.000000 |
| Li | -2.499104 | 0.812008  | -0.000000 |
| Li | 0.000000  | -2.356836 | -2.733633 |
| Li | 2.241484  | -0.728302 | -2.733633 |
| Li | -2.241484 | -0.728302 | -2.733633 |
| Li | 1.385313  | 1.906720  | -2.733633 |
| Li | -1.385313 | 1.906720  | -2.733633 |
| Li | 0.000000  | 0.000000  | -4.922462 |
| V  | 0.000000  | 0.000000  | 0.876226  |
| V  | 0.000000  | 0.000000  | -0.876226 |
